# Supplementary material for: Spontaneous atopic dermatitis is mediated by innate immunity, with the secondary lung inflammation of the atopic march requiring adaptive immunity
Source: PubMed Central journal article supplement (PMC4735016; doi:10.1016/j.jaci.2015.06.045), 2016-02

Figure E1

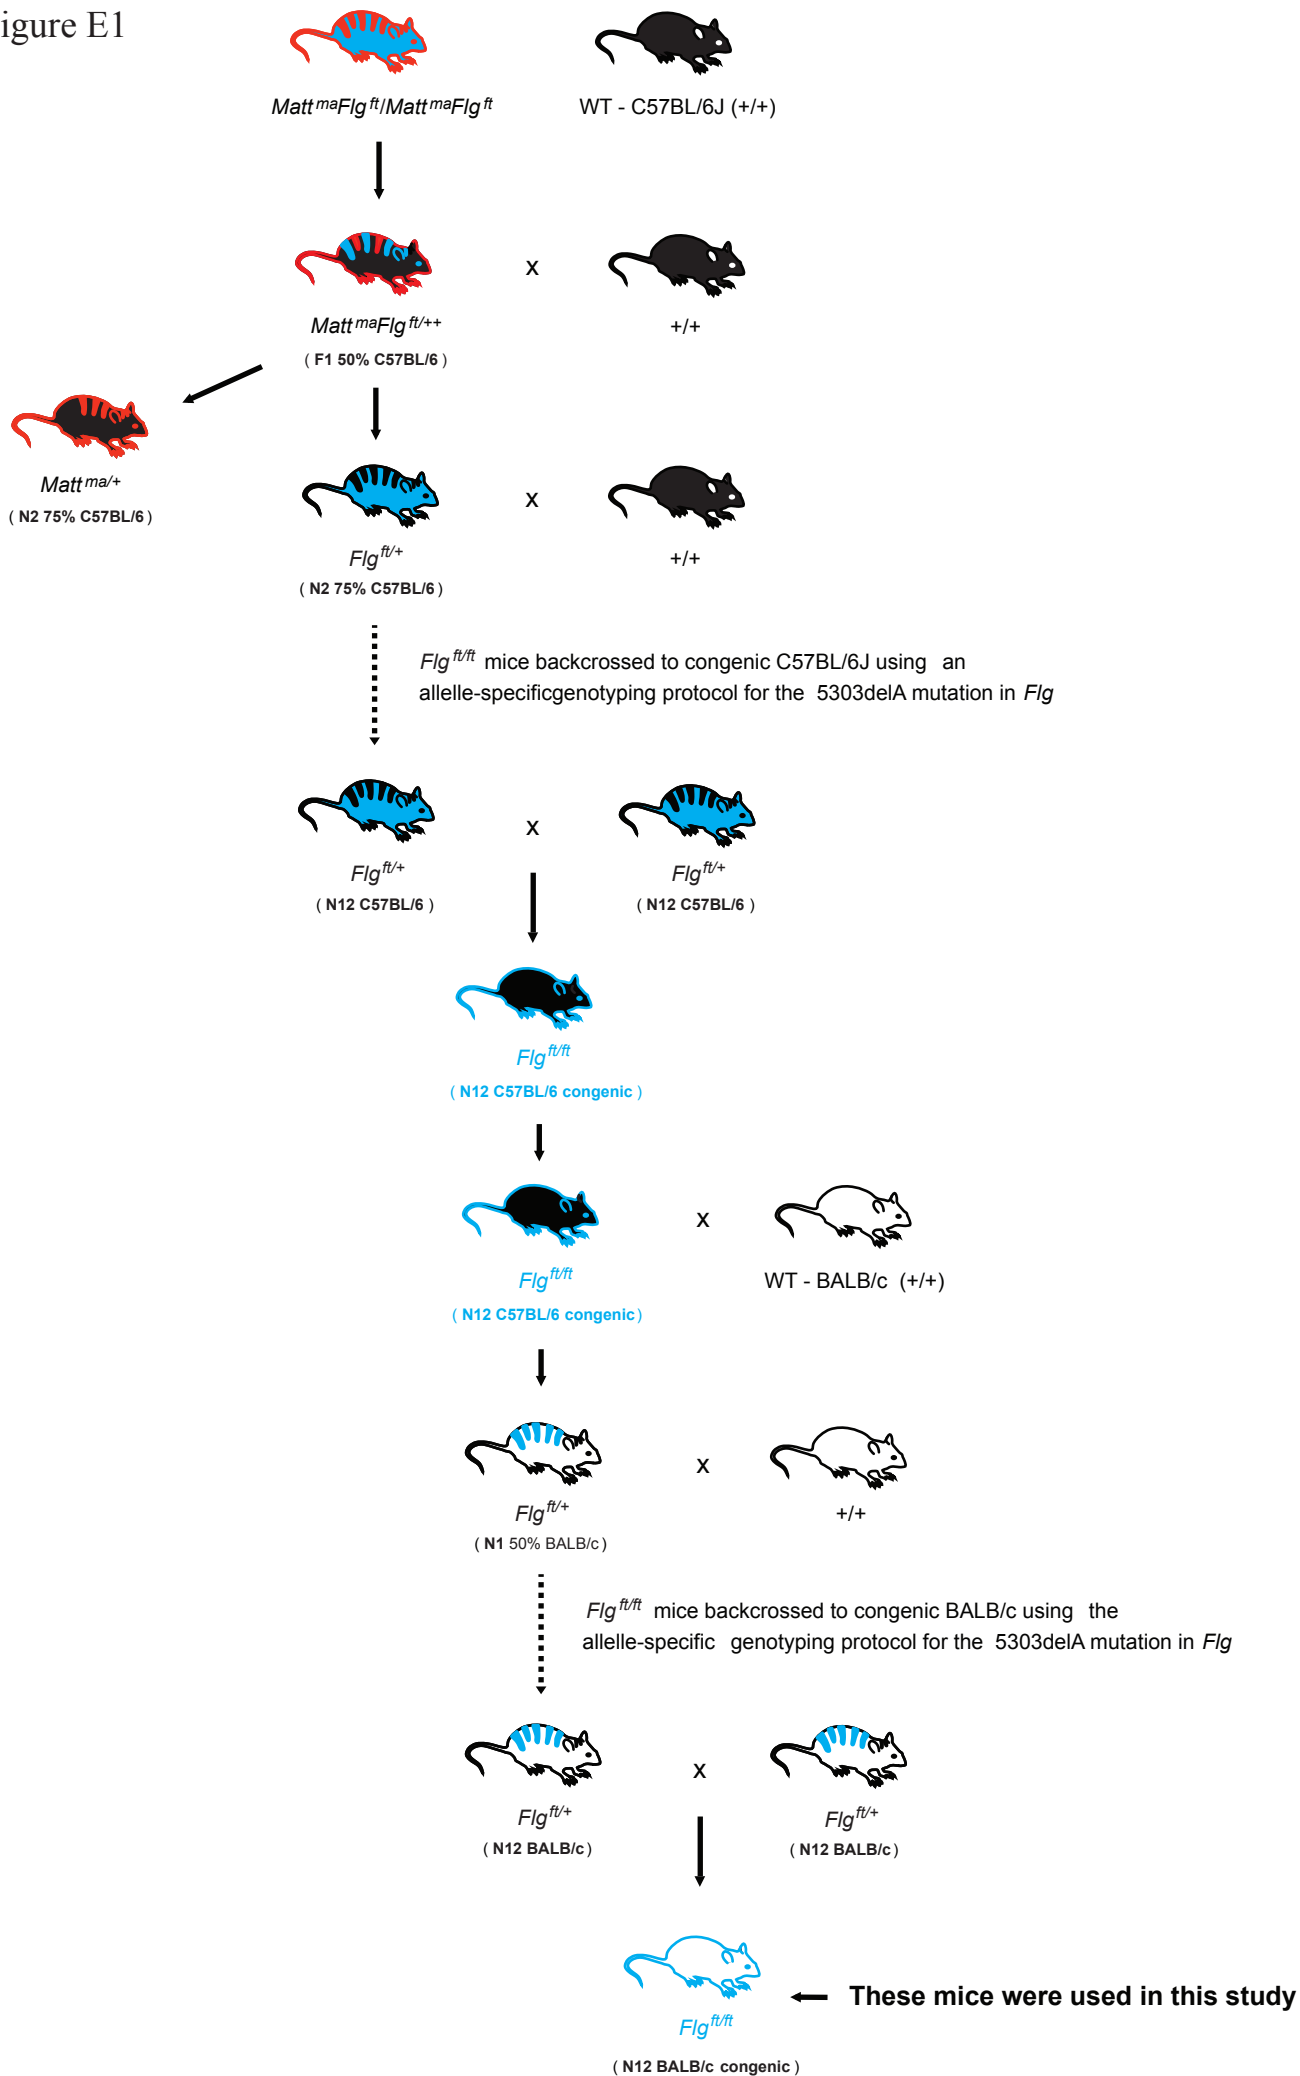

Supplement: mmc3.pdf [file mmc3.pdf]
